# Supplementary material
Source: Springer Nature journal article supplement (https://www.springermedizin.de/resource/supplementary/12874_2010_660_MOESM4_ESM.pdf/9432356)
Supplement: MOESM4 [file 9432356]

Identify the decision problem

Determine the model assumptions

Frame the decision problem

Search for models with similar problems

Extant?

No

Yes

Select the appropriate model (or type)

Use the (modified) extant structure

Construct the model

Validate the model

Valid?

No

Yes

Restructure the model

Finalise the model

1st Session  
Expert Panel

2nd & 3rd Sessions  
Expert Panel
